# Supplementary material
Source: publisher site journal article supplement (https://www.dovepress.com/article/229828)
Supplement: Supplementary file 1 [file get_supplementary_file.php]

| Supplementary Table. Frequencies, Percentages and Odds Ratios of Cases of SNHL and Metabolic Syndrome in Different Ages. | | | | | | | | |
| --- | --- | --- | --- | --- | --- | --- | --- | --- |
| Age (n) | Sensorineural Hearing Loss | | | Metabolic Syndrome | | | | |
|  | n | % | OR (95% CI) | n | % | | | OR (95% CI) |
| >20 ≤29 (47) | 21 | 44.68 | 0.47 (0.20-1.10) | 12 | | 25.53 | 0.27 (0.11-0.66) | |
| ≥30 ≤39 (35) | 21 | 60.00 | 1.56 (0.66-3.70) | 19 | | 54.29 | 2.75 (1.13-6.67) | |
| ≥40 (6) | 5 | 66.67 | 4.76 (0.53-42.56) | 4 | | 66.66 | 3.29 (0.57-19.03) | |
| Total | 47 | 53.41 |  | 35 | 39.77 | | |  |

OR: Odds Ratio; 95% CI, 95% confidence intervals.
